# Supplementary material for: Transcriptomic Sequencing Analysis on Key Genes and Pathways Regulating Cadmium (Cd) in Ryegrass (Lolium perenne L.) under Different Cadmium Concentrations
Source: MDPI journal article supplement (doi:10.3390/toxics10120734), 2022-11-28
Supplement: s1 [file s1]

**Table S1.** The growth and physiological indicators of ryegrass.

| Treatment | Height (cm)        | Weight (g)        | Tiller numbers    | Soluble protein ( $\mu\text{g}\cdot\text{g}^{-1}\text{FW}$ ) | Chla ( $\text{mg}\cdot\text{g}^{-1}\text{FW}$ ) |
|-----------|--------------------|-------------------|-------------------|--------------------------------------------------------------|-------------------------------------------------|
| C0        | 65.07 $\pm$ 2.20a  | 17.19 $\pm$ 1.60a | 6.33 $\pm$ 0.52a  | 242.67 $\pm$ 16.36b                                          | 2.68 $\pm$ 0.48a                                |
| C5        | 60.17 $\pm$ 1.57ab | 13.79 $\pm$ 1.13b | 5.00 $\pm$ 0.89a  | 252.78 $\pm$ 19.47ab                                         | 3.03 $\pm$ 0.38a                                |
| C25       | 56.57 $\pm$ 1.66ab | 13.47 $\pm$ 1.41b | 5.67 $\pm$ 1.37a  | 282.78 $\pm$ 12.71a                                          | 3.10 $\pm$ 0.23a                                |
| C50       | 53.57 $\pm$ 4.29bc | 12.17 $\pm$ 0.82b | 5.33 $\pm$ 0.52a  | 252.28 $\pm$ 13.43ab                                         | 2.96 $\pm$ 0.32a                                |
| C100      | 53.67 $\pm$ 2.44cd | 12.44 $\pm$ 1.03b | 4.67 $\pm$ 0.52ab | 232.83 $\pm$ 20.63b                                          | 3.03 $\pm$ 0.52a                                |
| C500      | 48.77 $\pm$ 3.19d  | 5.00 $\pm$ 0.41c  | 3.00 $\pm$ 0.89b  | 261.44 $\pm$ 11.79ab                                         | 3.15 $\pm$ 0.39a                                |
| <i>F</i>  | 10.531             | 30.200            | 4.350             | 2.716                                                        | 0.427                                           |
| <i>P</i>  | < 0.001            | < 0.001           | 0.017             | 0.073                                                        | 0.821                                           |

Note: Data are expressed as mean values with standard deviations ( $\pm$ SD), and analyzed by ANOVA with Duncan's test. Different lowercase letters indicate that values are significantly different at  $P < 0.05$ .

**Table S2.** Enzyme activity varying in ryegrass.

| Treatment | MDA ( $\text{nmol}\cdot\text{g}^{-1}\text{FW}$ ) | SOD ( $\text{U}\cdot\text{g}^{-1}\text{FW}$ ) | POD ( $\text{U}\cdot\text{g}^{-1}\text{FW}$ ) | CAT ( $\text{U}\cdot\text{g}^{-1}\text{FW}$ ) |
|-----------|--------------------------------------------------|-----------------------------------------------|-----------------------------------------------|-----------------------------------------------|
| C0        | 27.83 $\pm$ 2.31b                                | 37.41 $\pm$ 3.55d                             | 76.17 $\pm$ 13.34c                            | 4.50 $\pm$ 0.82c                              |
| C5        | 19.37 $\pm$ 3.14d                                | 208.78 $\pm$ 69.10c                           | 109.17 $\pm$ 11.90b                           | 5.20 $\pm$ 1.42c                              |
| C25       | 19.90 $\pm$ 2.12cd                               | 254.69 $\pm$ 46.08c                           | 148.67 $\pm$ 8.85a                            | 7.80 $\pm$ 0.54a                              |
| C50       | 17.92 $\pm$ 2.41d                                | 513.59 $\pm$ 110.79b                          | 135.00 $\pm$ 29.33ab                          | 6.23 $\pm$ 0.05abc                            |
| C100      | 24.77 $\pm$ 0.14bc                               | 812.13 $\pm$ 131.42a                          | 108.00 $\pm$ 12.23b                           | 7.37 $\pm$ 0.69ab                             |
| C500      | 33.78 $\pm$ 3.50a                                | 338.16 $\pm$ 47.12c                           | 133.92 $\pm$ 8.85ab                           | 5.97 $\pm$ 0.69bc                             |
| <i>F</i>  | 14.202                                           | 27.291                                        | 6.608                                         | 5.731                                         |
| <i>P</i>  | < 0.001                                          | < 0.001                                       | 0.004                                         | 0.006                                         |

Note: Data are expressed as mean values with standard deviations ( $\pm$ SD), and analyzed by ANOVA with Duncan's test. Different lowercase letters indicate that values are significantly different at  $P < 0.05$ .

**Table S3.** Antioxidant enzyme gene expression abundance in ryegrass under cadmium stress.

| Treatment | <i>POD</i>         | <i>CAT</i>        | <i>APX</i>       | <i>Cu/ZnSOD</i>  | <i>FeSOD</i>     | <i>MnSOD</i>      |
|-----------|--------------------|-------------------|------------------|------------------|------------------|-------------------|
| C0        | 1.03 $\pm$ 0.28b   | 1.00 $\pm$ 0.00c  | 1.75 $\pm$ 0.12b | 1.11 $\pm$ 0.54b | 1.03 $\pm$ 0.31c | 1.04 $\pm$ 0.34ab |
| C5        | 4.35 $\pm$ 2.00b   | 2.77 $\pm$ 1.98c  | 0.22 $\pm$ 0.14c | 0.57 $\pm$ 0.33c | 1.21 $\pm$ 0.58b | 1.30 $\pm$ 0.64a  |
| C25       | 25.34 $\pm$ 13.60a | 1.37 $\pm$ 0.87c  | 1.47 $\pm$ 0.02b | 0.86 $\pm$ 0.18b | 1.12 $\pm$ 0.62b | 1.45 $\pm$ 0.26a  |
| C50       | 2.05 $\pm$ 1.28b   | 1.62 $\pm$ 0.23c  | 2.88 $\pm$ 0.41a | 2.30 $\pm$ 0.63a | 2.58 $\pm$ 0.50b | 1.30 $\pm$ 0.16a  |
| C100      | 0.13 $\pm$ 0.03b   | 10.36 $\pm$ 3.87b | 1.45 $\pm$ 0.12b | 0.54 $\pm$ 0.16b | 2.52 $\pm$ 0.53b | 0.78 $\pm$ 0.08b  |
| C500      | 0.85 $\pm$ 0.16b   | 15.54 $\pm$ 5.13a | 3.34 $\pm$ 0.61a | 2.47 $\pm$ 0.57a | 4.17 $\pm$ 1.47a | 0.97 $\pm$ 0.17a  |
| <i>F</i>  | 9.013              | 14.429            | 37.741           | 13.452           | 7.826            | 2.719             |
| <i>P</i>  | 0.001              | < 0.001           | < 0.001          | < 0.001          | 0.002            | 0.072             |

Note: Data are expressed as mean values with standard deviations ( $\pm$ SD), and analyzed by ANOVA with Duncan's test. Different lowercase letters indicate that values are significantly different at  $P < 0.05$ .

**Table S4.** Summary of sequencing data statistics.

| Sample | Clean reads | Clean bases   | Error rate (%) | Q20 (%) | Q30 (%) | GC content (%) |
|--------|-------------|---------------|----------------|---------|---------|----------------|
| C0_1   | 46,641,088  | 6,842,055,349 | 0.0247         | 98.11   | 94.50   | 55.16          |
| C0_2   | 47,641,532  | 6,974,942,419 | 0.0245         | 98.21   | 94.72   | 55.32          |
| C0_3   | 43,093,830  | 6,339,134,777 | 0.0247         | 98.11   | 94.47   | 54.97          |
| C50_1  | 47,116,950  | 6,910,700,655 | 0.0245         | 98.19   | 94.68   | 56.23          |
| C50_2  | 50,036,728  | 7,364,445,126 | 0.0244         | 98.22   | 94.74   | 55.05          |
| C50_3  | 43,855,802  | 6,519,257,208 | 0.0244         | 98.24   | 94.79   | 55.54          |
| C500_1 | 51,212,352  | 7,403,707,950 | 0.0245         | 98.21   | 94.71   | 55.68          |
| C500_2 | 50,878,358  | 7,381,652,488 | 0.0245         | 98.20   | 94.68   | 54.31          |
| C500_3 | 46,455,420  | 6,794,815,811 | 0.0246         | 98.15   | 94.60   | 55.20          |

**Table S5.** Optimized transcriptome assembly details.

| Type                    | Unigene      | Transcript   |
|-------------------------|--------------|--------------|
| Total number            | 118,443      | 222,269      |
| Total sequence base     | 89,265,563   | 183,347,587  |
| Largest length (bp)     | 15,667       | 15,667       |
| Smallest length (bp)    | 201          | 201          |
| Average length (bp)     | 754          | 825          |
| N50 length (bp)         | 1168         | 1223         |
| E90N50 length (bp)      | 2091         | 1725         |
| Mean mapped percent (%) | 73.905       | 83.512       |
| GC percent (%)          | 49.34        | 50.06        |
| TransRate score         | 0.1691       | 0.22442      |
| BUSCO score             | 78.5% (1.1%) | 78.5% (1.1%) |

**Table S6.** Alignment and quality analysis of transcriptome data.

| Sample | Clean reads | Mapped reads | Mapped ratio |
|--------|-------------|--------------|--------------|
| C0_1   | 46,641,088  | 33,855,478   | 72.59%       |
| C0_2   | 47,641,532  | 34,550,862   | 72.52%       |
| C0_3   | 43,093,830  | 30,729,218   | 71.31%       |
| C50_1  | 47,116,950  | 33,972,838   | 72.10%       |
| C50_2  | 50,036,728  | 36,057,502   | 72.06%       |
| C50_3  | 43,855,802  | 31,191,086   | 71.12%       |
| C500_1 | 51,212,352  | 37,085,298   | 72.41%       |
| C500_2 | 50,878,358  | 37,188,322   | 73.09%       |
| C500_3 | 46,455,420  | 33,450,956   | 72.01%       |

**Table S7.** Unigenes annotation results from six databases.

|            | Unigene number | Percent (%) |
|------------|----------------|-------------|
| NR         | 52,373         | 44.22       |
| Swiss-Prot | 32,703         | 27.61       |
| Pfam       | 32,907         | 27.78       |
| COG        | 48,414         | 40.88       |
| GO         | 43,497         | 36.72       |
| KEGG       | 20,654         | 17.44       |
| Total_anno | 53,550         | 45.21       |
| Total      | 118,443        | 100         |

**Table S8.** Primers used for qRT-PCR.

| Gene ID        | Primer sequences (5'to3')                           | Product size (bp) |
|----------------|-----------------------------------------------------|-------------------|
| DN12652_c0_g1  | F: AGGAAATGATGGACAGCGGG<br>R: ACAGTTGGGCACTACCTCCT  | 103               |
| DN5585_c0_g1   | F: CGAGGAGGACAGATAGCTCG<br>R: TGAAATCCACGGAAGCCACT  | 90                |
| DN123028_c0_g1 | F: GCAAAGATGGATGCCTCGGA<br>R: TGCAATGGCTGTCCTTGACT  | 99                |
| DN92214_c0_g2  | F: TGACCGTATGCCATCTGCAC<br>R: TTTACAGACGACGGCGACAA  | 93                |
| DN18566_c0_g1  | F: GATCGAGGCCTGGGATGAAC<br>R: TTCAGAAGATCAGCCGACCG  | 92                |
| DN85_c0_g1     | F: ATATGCCCCGTCTACCTCCCA<br>R: TTGGGTTTCGCTACGGAGTC | 92                |
| DN18177_c0_g1  | F: CACGAACACGACATGACATT<br>R: AAATTACGGGAGCATGCGTT  | 120               |
| DN290_c0_g3    | F: ACAAACACCAACCTCGGCA<br>R: TGTGGGATGTCGATCACCAG   | 107               |
| DN4816_c0_g1   | F: CAAAGCGATCGGATTCGCAG<br>R: GCTGGTCCTCTGCATCCATT  | 92                |
| DN75_c0_g1     | F: TCGCGTTCTCTATCCGCTTC<br>R: TTGCCACTTCCGTTCCGAAT  | 95                |

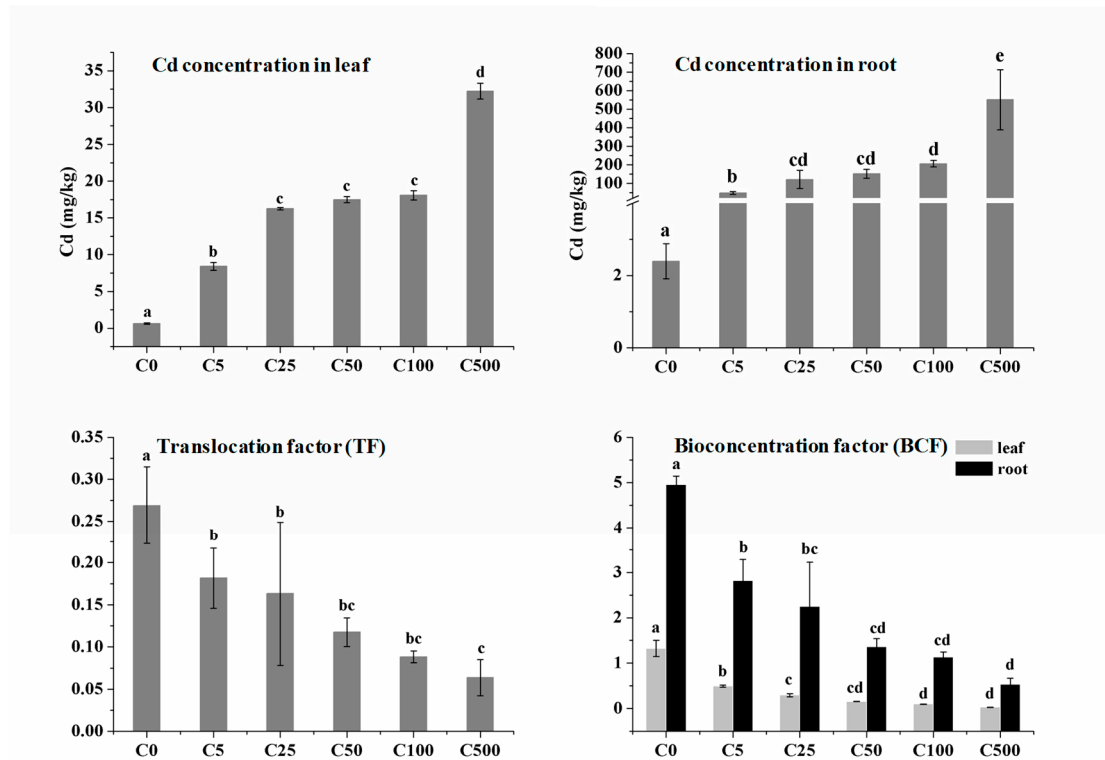

**Figure S1.** Accumulation of Cd content in different parts of ryegrass.

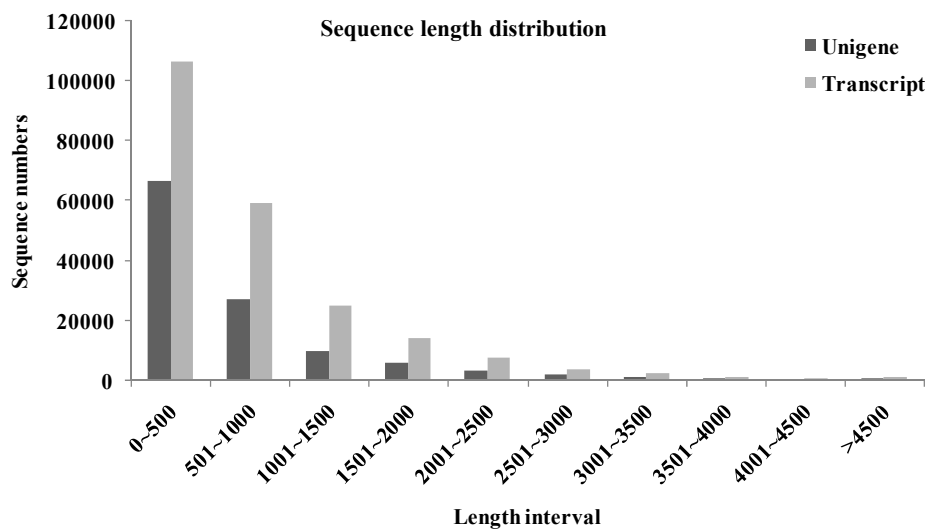

**Figure S2.** The distribution of unigenes and transcripts retrieving from ryegrass transcriptome.

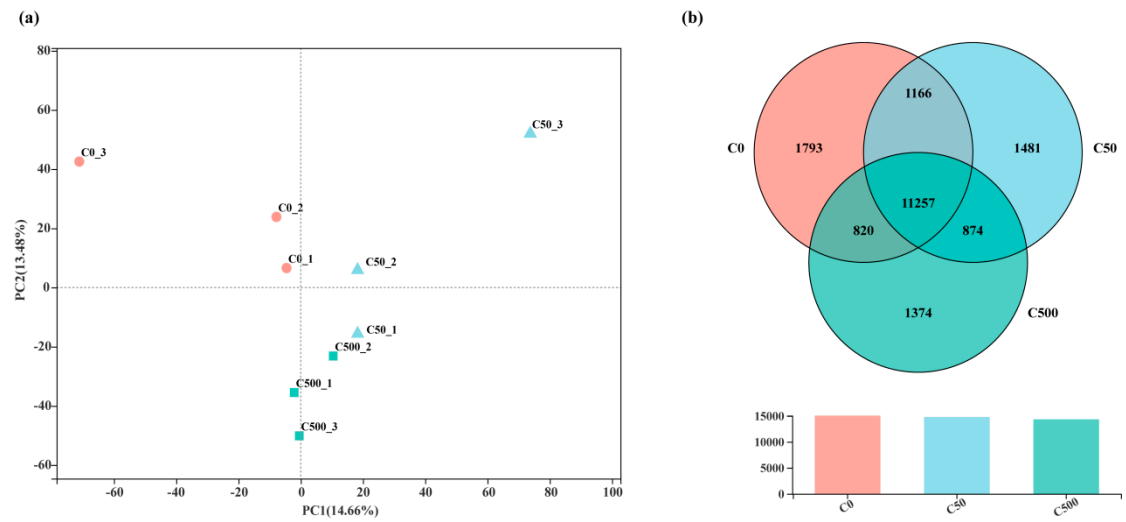

**Figure S3.** (a) Principal component analysis (PCA) of expression genes in different treatments. (b) Venn diagram of expression genes among three treatments.

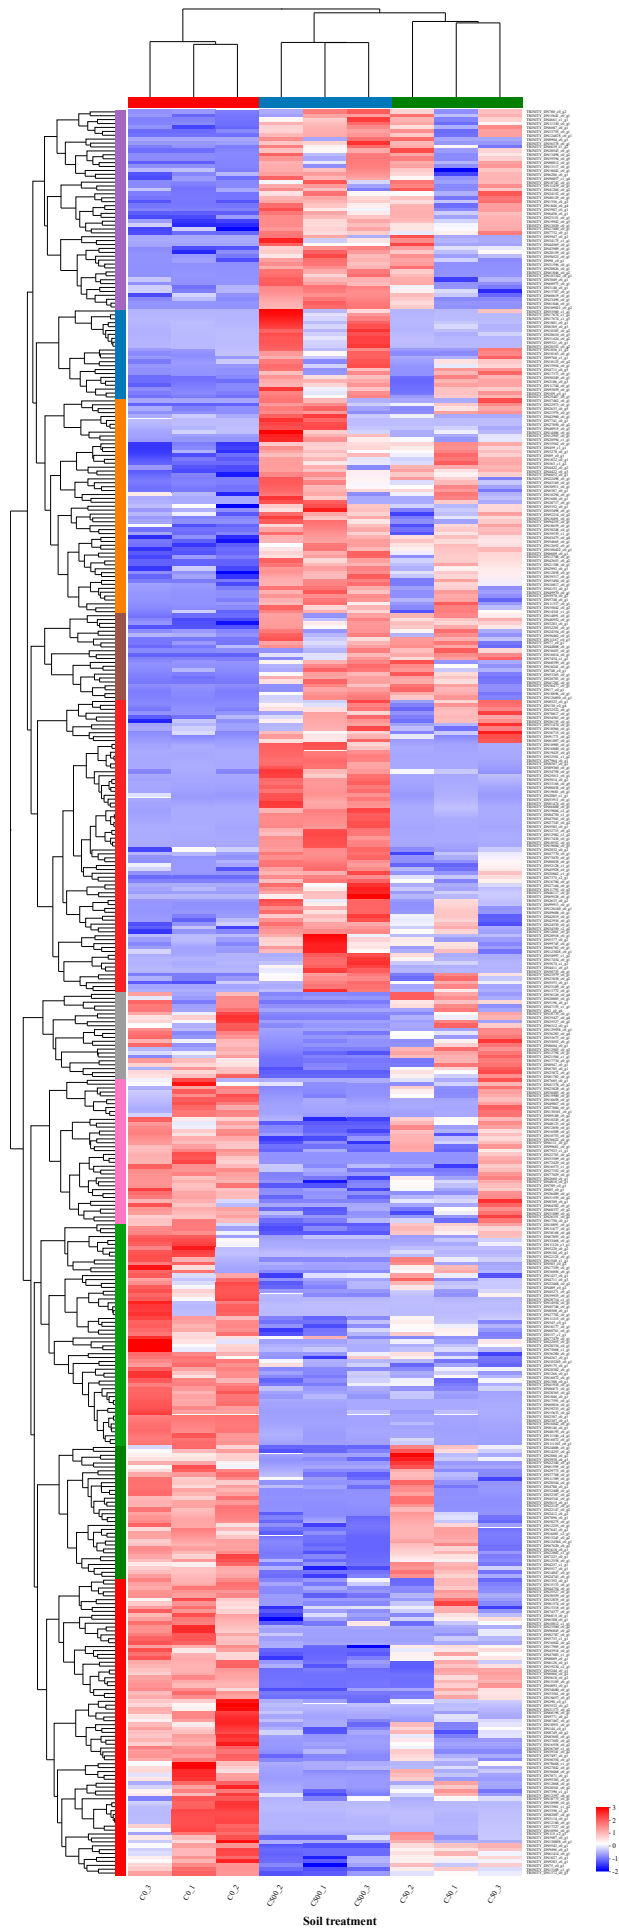

**Figure S4.** Cluster analysis of differentially expressed genes. Note: Each line represented an unigene. Red represented the high expression level of the unigene in the sample, blue represented the low expression level. On the left is a dendrogram of unigene clustering. Branches with similar expression of unigene are clustered together.

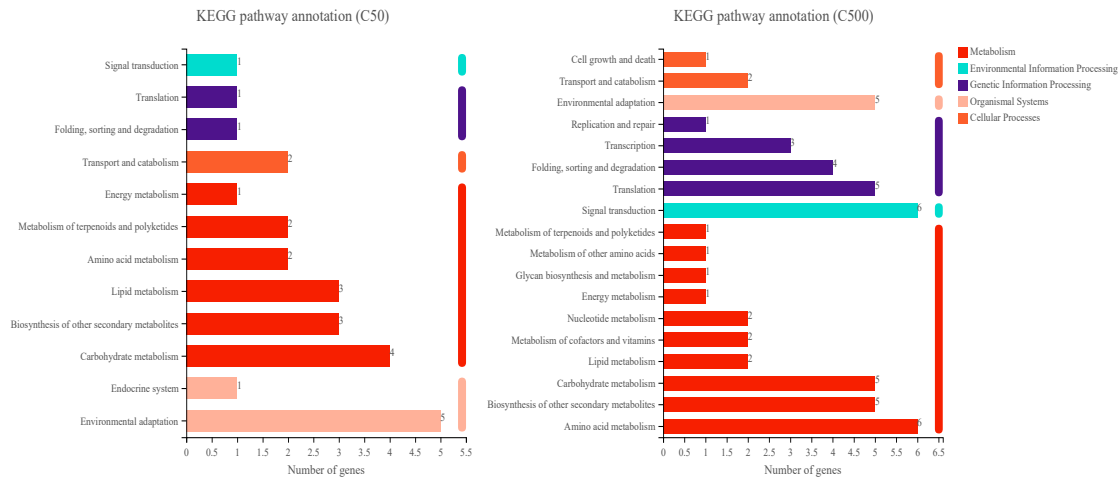

**Figure S5.** KEGG analysis of DEGs in ryegrass leaves among different treatments.

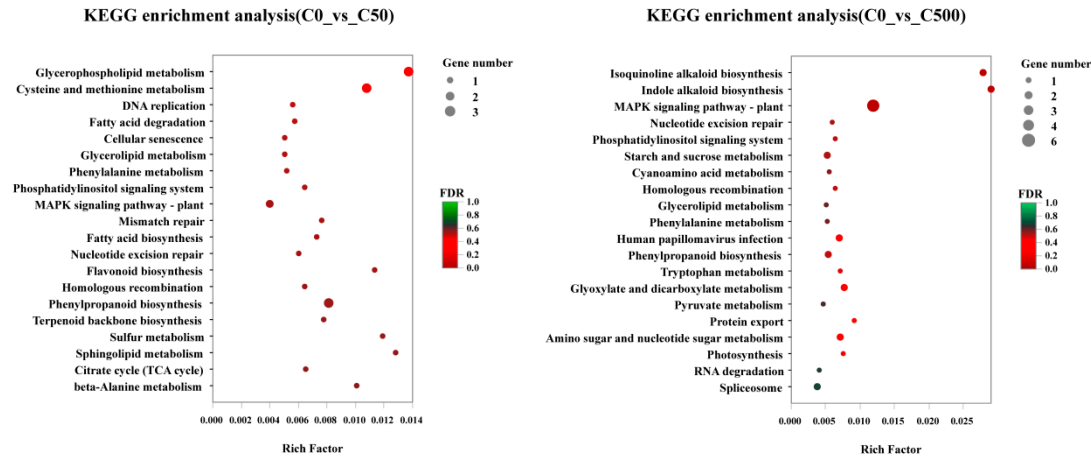

**Figure S6.** KEGG enrichment analysis of significantly regulated genes in ryegrass leaves under Cd stress.
